# Supplementary material
Source: PubMed Central journal article supplement (PMC3700064)
Supplement: Supp_Fig1.pdf [file Supp_Fig1.pdf]

## Supplementary Data

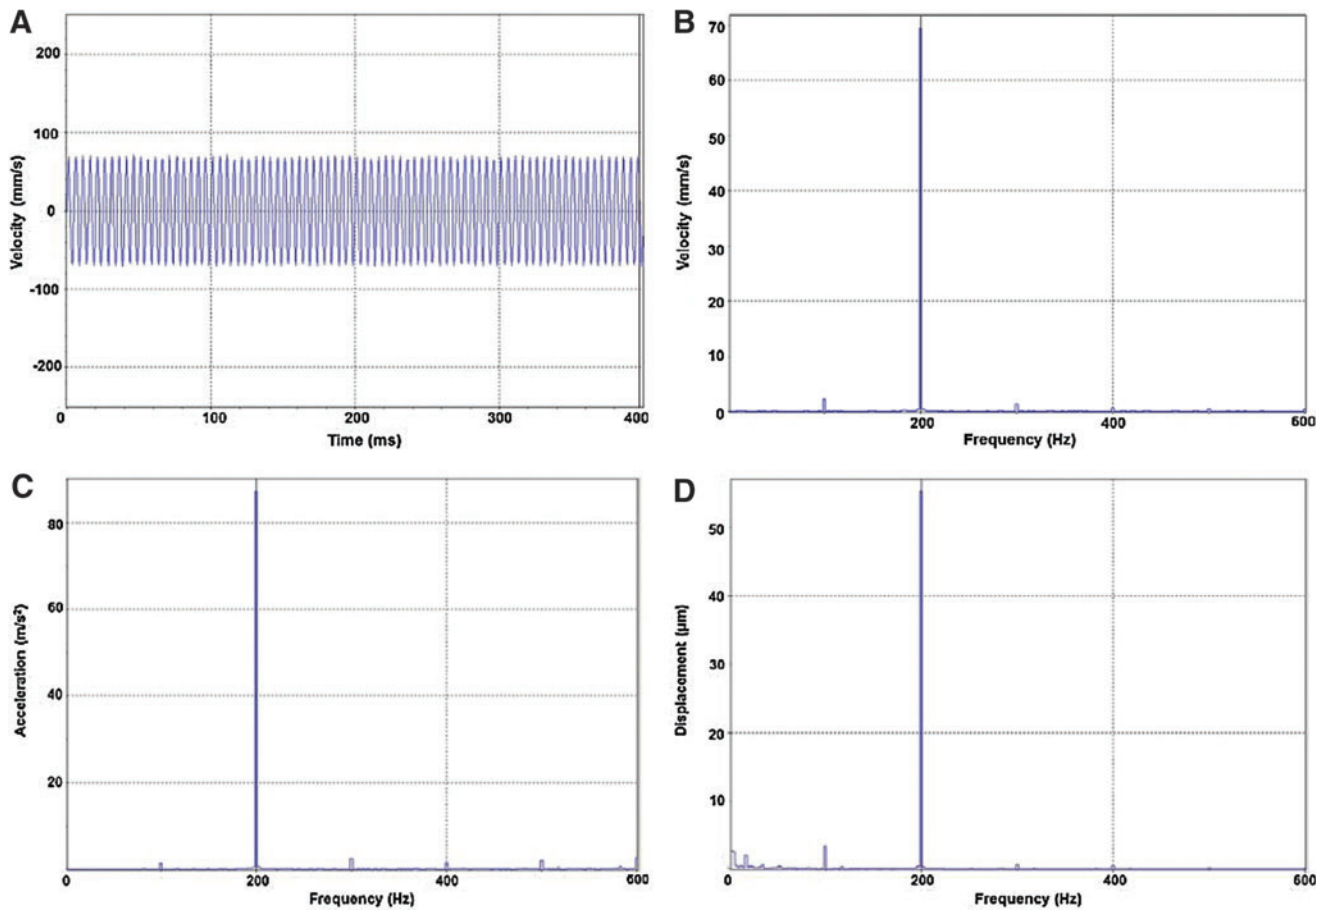

**SUPPLEMENTARY FIG. S1.** Vibration characteristics detected at the center of the silicone disk at a frequency of 200 Hz and a driving voltage of 0.8 V. **(A)** Velocity profile as a function of time. **(B)** Velocity profile as a function of frequency. **(C)** Acceleration as a function of frequency. **(D)** Normal displacement as a function of frequency.
