# Supplementary material
Source: PubMed Central journal article supplement (PMC3700064)
Supplement: Supp_Fig2.pdf [file Supp_Fig2.pdf]

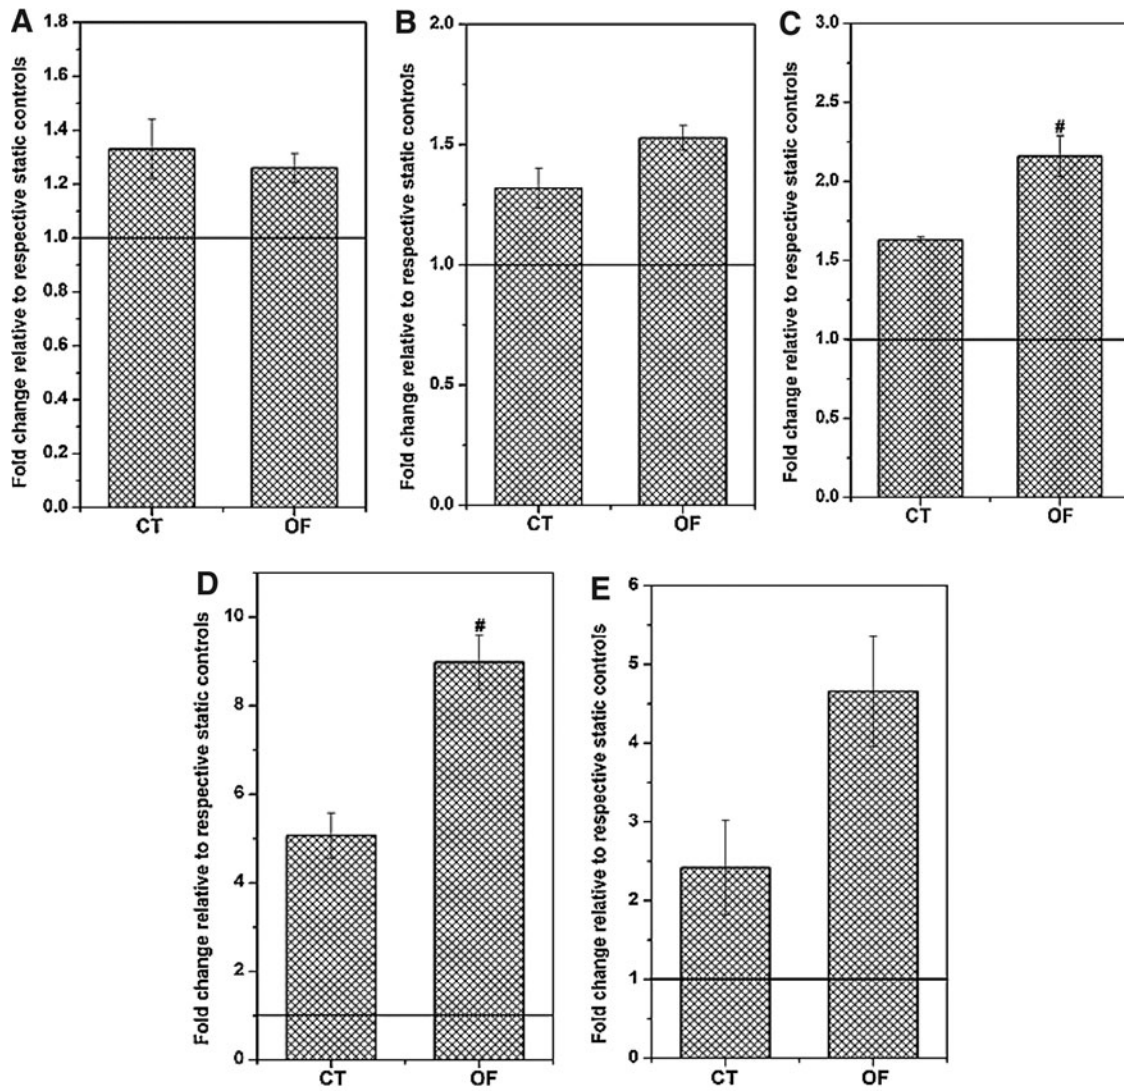

**SUPPLEMENTARY FIG. S2.** Biochemical quantification of ELN (A: insoluble; B: soluble), HA (C), TNC (D), and MMP1 (E) produced by mesenchymal stem cells cultured on/in the poly ( $\epsilon$ -caprolactone) scaffolds under ST, CT, and OF vibration conditions. The fold increases relative to the respective static controls were averaged from 3–4 independent trials under each vibration condition. #significantly ( $p < 0.05$ ) different between CT and OF vibrations.
